# Supplementary material for: Computational Identification and Characterization of a Promiscuous T-Cell Epitope on the Extracellular Protein 85B ofMycobacteriumspp. for Peptide-Based Subunit Vaccine Design
Source: Hindawi journal article supplement (doi:10.1155/2017/4826030), 2017-01-01
Supplement: f1 [file 4826030.f1.pdf]

## **Additional Files**

**Additional file 1-Table S1:** Binding of epitopes of IvAgNP from Influenza virus against MHC II alleles

**Additional file 2-Table S2:** Binding affinity of predicted strongest epitope 301-IDPFRLQLNSQVYSL-315 from IvAgNP to MHC alleles

**Additional file 3-Table S3:** Accession numbers of antigenic Ag85B sequences of *Mycobacterium* pathogenic strains found in protein database

**Additional file 4-Figure S1:** Multiple alignment of protein sequences of IvAgNP from Influenza virus

**Additional file 5-Table S4:** Hydrogen Bonds and binding statistics of epitope 181-QQFIYAGSLSALLDP-195 from Ag85B with MHC II complexes

**Additional file 6-Figure S2:** Docking of predicted strongest epitope 301-IDPFRLQLNSQVYSL-315 from IvAgNP with HLA-DRB1\*0101 (A), DRB1\*0901 (B), DRB1\*0404 (C) and DRB1\*0701 (D)

**Additional file 7-Table S5:** Hydrogen Bonds and binding statistics of predicted strongest epitope 301-IDPFRLQLNSQVYSL-315 from IvAgNP with MHC II complexes

**Additional file 8-Table S6:** Hydrogen Bonds and binding statistics of epitope 181-QQFIYAGSLSALLDP-195 from Ag85B with MHC I complexes

**Additional file 9-Figure S3:** Docking of control epitope 380-ELRSRYWAIRTRSG-393 from IvAgNP with HLA-B8 (A) and B27 (B)

**Additional file 10-Table S7:** Hydrogen Bonds and binding statistics of control epitope 380-ELRSRYWAIRTRSG-393 from IvAgNP with MHC I complexes

**Additional file 11-Figure S4:** Docking of predicted strongest epitope 301-IDPFRLQLNSQVYSL-315 from IvAgNP with HLA-A2 (A), A3 (B), B27 (C), B39 (D) and B58 (E)

**Additional file 12-Table S8:** Hydrogen Bonds and binding statistics of predicted strongest epitope 301-IDPFRLQLNSQVYSL-315 from IvAgNP with MHC I complexes

**Additional file 13-Figure S5:** Multiple alignments of amino acid sequences of HLA-A and HLA-B series

**Additional file 1-Table S1:** Binding of epitopes of IvAgNP from Influenza virus against MHC II molecules<sup>a</sup>

| MHC II molecule      | Strongest epitope |                        |                      |               | No of strong binding epitopes | No of weak binding epitopes |
|----------------------|-------------------|------------------------|----------------------|---------------|-------------------------------|-----------------------------|
|                      | Start position    | Full peptide (15 mer)  | Core peptide (9 mer) | Affinity (nM) |                               |                             |
| <b>HLA-DRB1*0101</b> | <b>301</b>        | <b>IDPFRLQLNSQVYSL</b> | <b>FRLQLNSQV</b>     | <b>3.4</b>    | <b>98</b>                     | <b>212</b>                  |
| HLA-DRB1*0301        | 106               | RELILYDKKEIRRIW        | ILYDKKEIR            | 7.6           | 7                             | 59                          |
| HLA-DRB1*0401        | 441               | RTEIIRMMESARPEDDP      | IRMMESARP            | 12            | 13                            | 139                         |
| HLA-DRB1*0404        | 302               | FRLQLNSQVYSLIVGID      | FRLQLNSQV            | 7.4           | 28                            | 139                         |
| HLA-DRB1*0405        | 299               | PFRLQLNSQVY            | FRLQLNSQV            | 18.4          | 13                            | 109                         |
| HLA-DRB1*0701        | 339               | EDLRVLSFIKGTKVLTE      | LSFIKGTKV            | 4             | 39                            | 112                         |
| HLA-DRB1*0901        | 442               | IIRMMESARPEVD          | IRMMESARP            | 27.6          | 10                            | 110                         |
| HLA-DRB1*1101        | 190               | VMELVRMIKRGINDRT       | LVRMIKRGV            | 8.6           | 36                            | 117                         |
| HLA-DRB1*1302        | 360               | RGVQIASNENMETMT        | VQIASNENM            | 41.1          | 2                             | 57                          |
| HLA-DRB1*1501        | 378               | LELRSRYWAIRTRS         | TLELRSRYW            | 26.8          | 8                             | 103                         |
| HLA-DRB3*0101        | 484               | EGSYFFGDNAEEYDN        | FFGDNAEEY            | 16.1          | 3                             | 46                          |
| HLA-DRB4*0101        | 440               | MRTEIIRMMESARPE        | IRMMESARP            | 15.6          | 9                             | 131                         |
| HLA-DRB5*0101        | 225               | ILKGFQTAQAQKAMM        | GKGFQTAQK            | 8.8           | 52                            | 114                         |
| HLA-DPA1*0103        | 250               | NAEFEDLTFLARSAL        | FEDLTFLAR            | 7.8           | 6                             | 52                          |
| -DPB1*0401           |                   |                        |                      |               |                               |                             |
| HLA-DPA1*0103        | 247               | NPGNAEFEDLTFLAR        | FEDLTFLAR            | 13.8          | 17                            | 83                          |
| -DPB1*0201           |                   |                        |                      |               |                               |                             |
| HLA-DPA1*0201        | 250               | NAEFEDLTFLARSAL        | FEDLTFLAR            | 14.5          | 19                            | 105                         |
| -DPB1*0101           |                   |                        |                      |               |                               |                             |
| HLA-DPA1*0301        | 247               | NPGNAEFEDLTFLAR        | FEDLTFLAR            | 24.7          | 12                            | 39                          |
| -DPB1*0402           |                   |                        |                      |               |                               |                             |
| HLA-DQA1*0101-       | 334               | HSAAFEDLRVLSFIK        | FEDLRVLSF            | 11.8          | 35                            | 76                          |
| DQB1*0501            |                   |                        |                      |               |                               |                             |
| HLA-DQA1*0102-       | 332               | ACHSAAFEDLRVLSF        | HSAAFEDLR            | 14            | 5                             | 25                          |
| DQB1*0602            |                   |                        |                      |               |                               |                             |
| HLA-DQA1*0102-       | 439               | DMRTEIIRMMESARP        | TEIIRMMES            | 11.2          | 42                            | 138                         |
| DQB1*0602            |                   |                        |                      |               |                               |                             |
| HLA-DQA1*0501-       | 483               | NEGSYFFGDNAEEYD        | FFGDNAEEY            | 13            | 3                             | 23                          |
| DQB1*0201            |                   |                        |                      |               |                               |                             |
| HLA-DQA1*0501-       | 170               | STLPRRSGAAGAAVK        | SGAAGAAVK            | 7.8           | 56                            | 126                         |
| DQB1*0301            |                   |                        |                      |               |                               |                             |

<sup>a</sup>NetMHCII 2.2 server was used for predication of epitopes from IvAgNP that showed strong binding affinity with 22 MHC II molecules. Affinity, below 50 nM is considered strong immunogenicity. The strongest epitope bound to HLA-DRB1\*0101 MHC II molecule is shaded.

**Additional file 2-Table S2:** Binding affinity of predicted strongest epitope 301-IDPFRLQLNSQVYSL-315 from IvAgNP to MHC alleles <sup>a</sup>

| MHC II Alleles | Promiscuous peptide sequence |                      | Affinity (nM) |
|----------------|------------------------------|----------------------|---------------|
|                | Full peptide (15 mer)        | Core peptide (9 mer) |               |
| HLA-DRB1*0101  | IDPFRLQLNSQVYSL              | FRLQLNSQV            | 3.4           |
| HLA-DRB1*0404  | IDPFRLQLNSQVYSL              | FRLQLNSQV            | 7.8           |
| HLA-DRB1*0405  | IDPFRLQLNSQVYSL              | FRLQLNSQV            | 21.1          |
| HLA-DRB1*0701  | IDPFRLQLNSQVYSL              | FRLQLNSQV            | 32.6          |
| HLA-DRB1*0901  | IDPFRLQLNSQVYSL              | FRLQLNSQV            | 39.4          |

<sup>a</sup>MHC allele was predicted by NetMHCII 2.2 servers. Binding affinity below 50 nM is considered high immunogenicity.

**Additional file 3-Table S3:** Accession numbers of all antigenic Ag85-B sequences of *Mycobacterium* pathogenic strains found in protein database

| <i>Mycobacterium</i> pathogenic strain    | Accession number | Number of identical sequences | Number of amino acid | Accession number of Identical sequences                                                                                                                                                                                                                                                                                                                                                                                                                                                                                                                                                                                                                                                                                                                                                                                                                                                                                                                       |
|-------------------------------------------|------------------|-------------------------------|----------------------|---------------------------------------------------------------------------------------------------------------------------------------------------------------------------------------------------------------------------------------------------------------------------------------------------------------------------------------------------------------------------------------------------------------------------------------------------------------------------------------------------------------------------------------------------------------------------------------------------------------------------------------------------------------------------------------------------------------------------------------------------------------------------------------------------------------------------------------------------------------------------------------------------------------------------------------------------------------|
| <i>M. Tuberculosis_2</i> CDC1551          | NP_336393.1      | 2                             | 374                  | NP_336393.1, AAK46207.1                                                                                                                                                                                                                                                                                                                                                                                                                                                                                                                                                                                                                                                                                                                                                                                                                                                                                                                                       |
| <i>M. Bovis_1</i> BCG str. Pasteur 1173P2 | YP_978013.1      | 10                            | 325                  | YP_978013.1, YP_005171366.1, AET19183.1, CCC64491.1, ADD50055.1, YP_002644961.1, BAH26193.1, A1KJU9.1, CAL71910.1, CAA44268.1                                                                                                                                                                                                                                                                                                                                                                                                                                                                                                                                                                                                                                                                                                                                                                                                                                 |
| <i>M. Tuberculosis_4</i> SUMu003          | ZP_07422952.2    | 12                            | 322                  | ZP_07422952.2, YP_005913165.1, YP_005909553.1, BAL65871.1, AEJ50558.1, AEJ46932.1, EGB28751.1, ZP_074402622, ZP_07436007.2, EFP38634.1, EFP30851.1, EFP19521.1                                                                                                                                                                                                                                                                                                                                                                                                                                                                                                                                                                                                                                                                                                                                                                                                |
| <i>M. Tuberculosis_5</i> H37Ra            | ZP_02552646.1    | 25                            | 310                  | ZP_02552646.1, GAA45592.1, ZP_07815649.1, EFP54785.1, EFP51110.1, EFP47207.1, EFP43274.1, EFP34332.1, EFP27102.1, EFP23309.1, EFP16040.1, EFO74877.1, ZP_07493616.1, ZP_07489096.1, ZP_07484878.1, ZP_07480643.1, ZP_07444836.1, ZP_07431632.1, ZP_07427317.1, ZP_07418226.1, ZP_07414444.1, ZP_06960553.1, ZP_06952228.1, ZP_06802485.1, ZP_05141345.1                                                                                                                                                                                                                                                                                                                                                                                                                                                                                                                                                                                                       |
| <i>M. bovis_2</i>                         | AAA25359.1       | 9                             | 323                  | AAA25359.1, AAQ77588.1, AAN20429.1, AAN19158.1, AAE80437.1, AAE55762.1, AAE40111.1, AAE36056.1, AAE31577.1                                                                                                                                                                                                                                                                                                                                                                                                                                                                                                                                                                                                                                                                                                                                                                                                                                                    |
| <i>M. Tuberculosis_3</i>                  | 1F0P A           | 1                             | 285                  | 1F0P A                                                                                                                                                                                                                                                                                                                                                                                                                                                                                                                                                                                                                                                                                                                                                                                                                                                                                                                                                        |
| <i>M. Intracellulare_3</i>                | BAA03243.1       | 1                             | 264                  | BAA03243.1                                                                                                                                                                                                                                                                                                                                                                                                                                                                                                                                                                                                                                                                                                                                                                                                                                                                                                                                                    |
| <i>M. Intracellulare_1</i> ATCC 13950     | YP_005338175.1   | 6                             | 315                  | YP_005338175.1, YP_005348339.1, YP_005343334.1, AFC54018.1, AFC49013.1, AFC43854.1                                                                                                                                                                                                                                                                                                                                                                                                                                                                                                                                                                                                                                                                                                                                                                                                                                                                            |
| <i>M. Tuberculosis_6</i>                  | 1F0N_A           | 1                             | 285                  | 1F0N_A                                                                                                                                                                                                                                                                                                                                                                                                                                                                                                                                                                                                                                                                                                                                                                                                                                                                                                                                                        |
| <i>M. kansasii</i> ATCC 12478             | ZP_04749192.1    | 5                             | 325                  | ZP_04749192.1, AAR68430.1, AAE27820.1, P21160.1, CAA37868.1                                                                                                                                                                                                                                                                                                                                                                                                                                                                                                                                                                                                                                                                                                                                                                                                                                                                                                   |
| <i>M. avium_1</i>                         | Q06947.1         | 3                             | 330                  | AAM58787.1, Q06947.1, CAA45032.1                                                                                                                                                                                                                                                                                                                                                                                                                                                                                                                                                                                                                                                                                                                                                                                                                                                                                                                              |
| <i>M. Tuberculosis_7</i>                  | AAO62005.1       | 1                             | 325                  | AAO62005.1                                                                                                                                                                                                                                                                                                                                                                                                                                                                                                                                                                                                                                                                                                                                                                                                                                                                                                                                                    |
| <i>M. intracellulare_2</i> ATCC 13950     | BAA03981.1       | 1                             | 330                  | BAA03981.1                                                                                                                                                                                                                                                                                                                                                                                                                                                                                                                                                                                                                                                                                                                                                                                                                                                                                                                                                    |
| <i>M. avium_2</i> subsp. Paratuberculosis | AAM21939.1       | 1                             | 330                  | AAM21939.1                                                                                                                                                                                                                                                                                                                                                                                                                                                                                                                                                                                                                                                                                                                                                                                                                                                                                                                                                    |
| <i>M. Tuberculosis_1</i> H37Rv            | NP_216402.1      | 72                            | 325                  | P0C5B9.1, YP_006515286.1, YP_005916959.1, YP_004745346.1, YP_004723581.1, YP_006473577.1, YP_005308170.1, YP_005923115.1, YP_005100587.1, ZP_07012790.1, ZP_06521415.1, ZP_06517371.1, ZP_06509845.1, ZP_06454795.1, ZP_06450191.1, ZP_06513358.1, ZP_06505060.1, ZP_06437244.1, ZP_06433108.1, ZP_04980753.1, ZP_04925390.1, YP_003032071.1, YP_001283215.1, YP_001287851.1, A5U3Q3.1, P0C2T2.1, NP_855570.1, AFE13119.1, CCE37368.1, AEN00338.1, EGE50422.1, EFD43577.1, EFD17659.1, EFD13523.1, EFD73559.1, EFD47366.1, AEB04248.1, EFI30469.1, EFD77569.1, EFD61996.1, EFD53698.1, EFD58483.1, ACT25176.1, ABQ73653.1, EBA42266.1, AFN49815.1, ABR06249.1, EAY60132.1, AFM49500.1, CCC26978.1, CCC44233.1, ADS25363.1, AAC44294.1, ADD50054.1, ADF19013.1, ABY17327.1, ABY08008.1, CAD94621.1, CAB10044.1, ACC93938.1, CAA44269.1, ABE22073.1, AAQ77586.1, AAN19156.1, AAN20427.1, AAM58786.1, AAE80435.1, AAE55760.1, AAE40109.1, AAE36054.1, AAE31575.1 |



<sup>a</sup>The control epitope 380-ELRSRYWAIRTRSG-393 and the predicted strongest epitope 301-IDPFRLQLNSQVYSL-315 is shown in the box. The epitope sequences from Influenza A virus is underlined. Non-identical epitope sequences are shaded and the amino acid residues for which the epitope varies are bold, italic and underlined

**Additional file 5-Table S4:** Hydrogen Bonds and binding statistics of epitope 181-QQFIYAGSLSALLDP-195 with MHC II complexes<sup>a</sup>

| Epitope-MHC II complex | No. of H-bonds | Binding energy (kcal/mol) | Receptor residues in MHC I | Ligand residues in epitope | Interacting atoms | H-bond distance (Å) |
|------------------------|----------------|---------------------------|----------------------------|----------------------------|-------------------|---------------------|
| Epitope-HLA-DRB1*0101  | 9              | -181.93                   | W61                        | Q1                         | H-O               | 2.55                |
|                        |                |                           | Q64                        | Q1                         | H-O               | 1.85                |
|                        |                |                           | Q70                        | Y5                         | H-O               | 2.43                |
|                        |                |                           | R71                        | Q2                         | H-O               | 1.84                |
|                        |                |                           | R71                        | Q2                         | H-O               | 1.97                |
|                        |                |                           | Y78                        | L9                         | H-O               | 1.65                |
|                        |                |                           | N82                        | S10                        | H-O               | 2.11                |
|                        |                |                           | Q64                        | Q1                         | O-H               | 2.25                |
|                        |                |                           | T77                        | Y5                         | O-H               | 2.56                |
| Epitope-HLA-DRA        | 6              | -204.17                   | N69                        | L13                        | H-O               | 2.41                |
|                        |                |                           | N69                        | P15                        | H-O               | 2.45                |
|                        |                |                           | N69                        | L13                        | H-O               | 2.18                |
|                        |                |                           | E11                        | S10                        | O-H               | 2.38                |
|                        |                |                           | F48                        | Q2                         | O-H               | 2.48                |
|                        |                |                           | F48                        | Q2                         | O-H               | 2.64                |
| Epitope-HLA-DRB1*0404  | 9              | -162.42                   | H13                        | Q1                         | H-O               | 2.64                |
|                        |                |                           | Y60                        | L13                        | H-O               | 2.76                |
|                        |                |                           | D28                        | Q1                         | O-H               | 2.38                |
|                        |                |                           | D28                        | Q1                         | O-H               | 2.65                |
|                        |                |                           | Q64                        | D14                        | O-H               | 2.78                |
|                        |                |                           | D66                        | S10                        | O-H               | 2.38                |
|                        |                |                           | D66                        | S8                         | O-H               | 2.36                |
|                        |                |                           | Q70                        | Y5                         | O-H               | 2.30                |
|                        |                |                           | T77                        | Q2                         | O-H               | 2.14                |
| Epitope-HLA-DRB1*0701  | 8              | -179.42                   | C15                        | P15                        | H-O               | 2.14                |
|                        |                |                           | S60                        | Q1                         | H-O               | 2.62                |
|                        |                |                           | W61                        | I4                         | H-O               | 2.46                |
|                        |                |                           | R71                        | L9                         | H-O               | 2.38                |
|                        |                |                           | Q74                        | D14                        | H-O               | 1.92                |
|                        |                |                           | N82                        | D14                        | H-O               | 2.19                |
|                        |                |                           | N82                        | L13                        | H-O               | 2.14                |
|                        |                |                           | Q64                        | Q1                         | O-H               | 2.76                |
| Epitope-HLA-DRB1*0901  | 6              | -178.35                   | Y26                        | D14                        | H-O               | 2.22                |
|                        |                |                           | Y26                        | D14                        | H-O               | 2.70                |
|                        |                |                           | R71                        | L13                        | H-O               | 2.32                |
|                        |                |                           | R71                        | L13                        | H-O               | 2.53                |
|                        |                |                           | T77                        | P15                        | H-O               | 2.59                |
|                        |                |                           | Y32                        | I4                         | O-H               | 2.40                |
| Epitope-HLA-DPB1*0101  | 5              | -159.39                   | N62                        | S8                         | H-O               | 2.66                |
|                        |                |                           | N62                        | S8                         | H-O               | 2.01                |
|                        |                |                           | Y9                         | S10                        | O-H               | 2.50                |
|                        |                |                           | G58                        | S8                         | O-H               | 2.28                |
|                        |                |                           | A64                        | Q2                         | O-H               | 2.55                |
| Epitope-HLA-DQB1*0301  | 9              | -202.60                   | Y37                        | L13                        | H-O               | 2.38                |
|                        |                |                           | Y37                        | D14                        | H-O               | 2.34                |
|                        |                |                           | W61                        | A11                        | H-O               | 2.79                |
|                        |                |                           | Q64                        | S10                        | H-O               | 2.47                |
|                        |                |                           | R70                        | L9                         | H-O               | 2.52                |
|                        |                |                           | N82                        | Q1                         | H-O               | 2.70                |
|                        |                |                           | Q64                        | S10                        | O-H               | 2.13                |
|                        |                |                           | T77                        | Q1                         | O-H               | 2.20                |
|                        |                |                           | N82                        | Q1                         | O-H               | 2.10                |

<sup>a</sup>Hydrogen bonding distance and binding energy were analyzed in Molsoft ICM-pro 3.5 computer program. Fifteen amino acid residues in the epitope (181-QQFIYAGSLSALLDP-195) have been numbered 1-15.



**Additional file 6-Figure S2:** Docking of predicted strongest epitope 301-IDPFRLQLNSQVYSL-315 from IvAgNP with HLA-DRB1\*0101 (A), DRB1\*0901 (B), DRB1\*0404 (C) and DRB1\*0701 (D)<sup>a</sup>

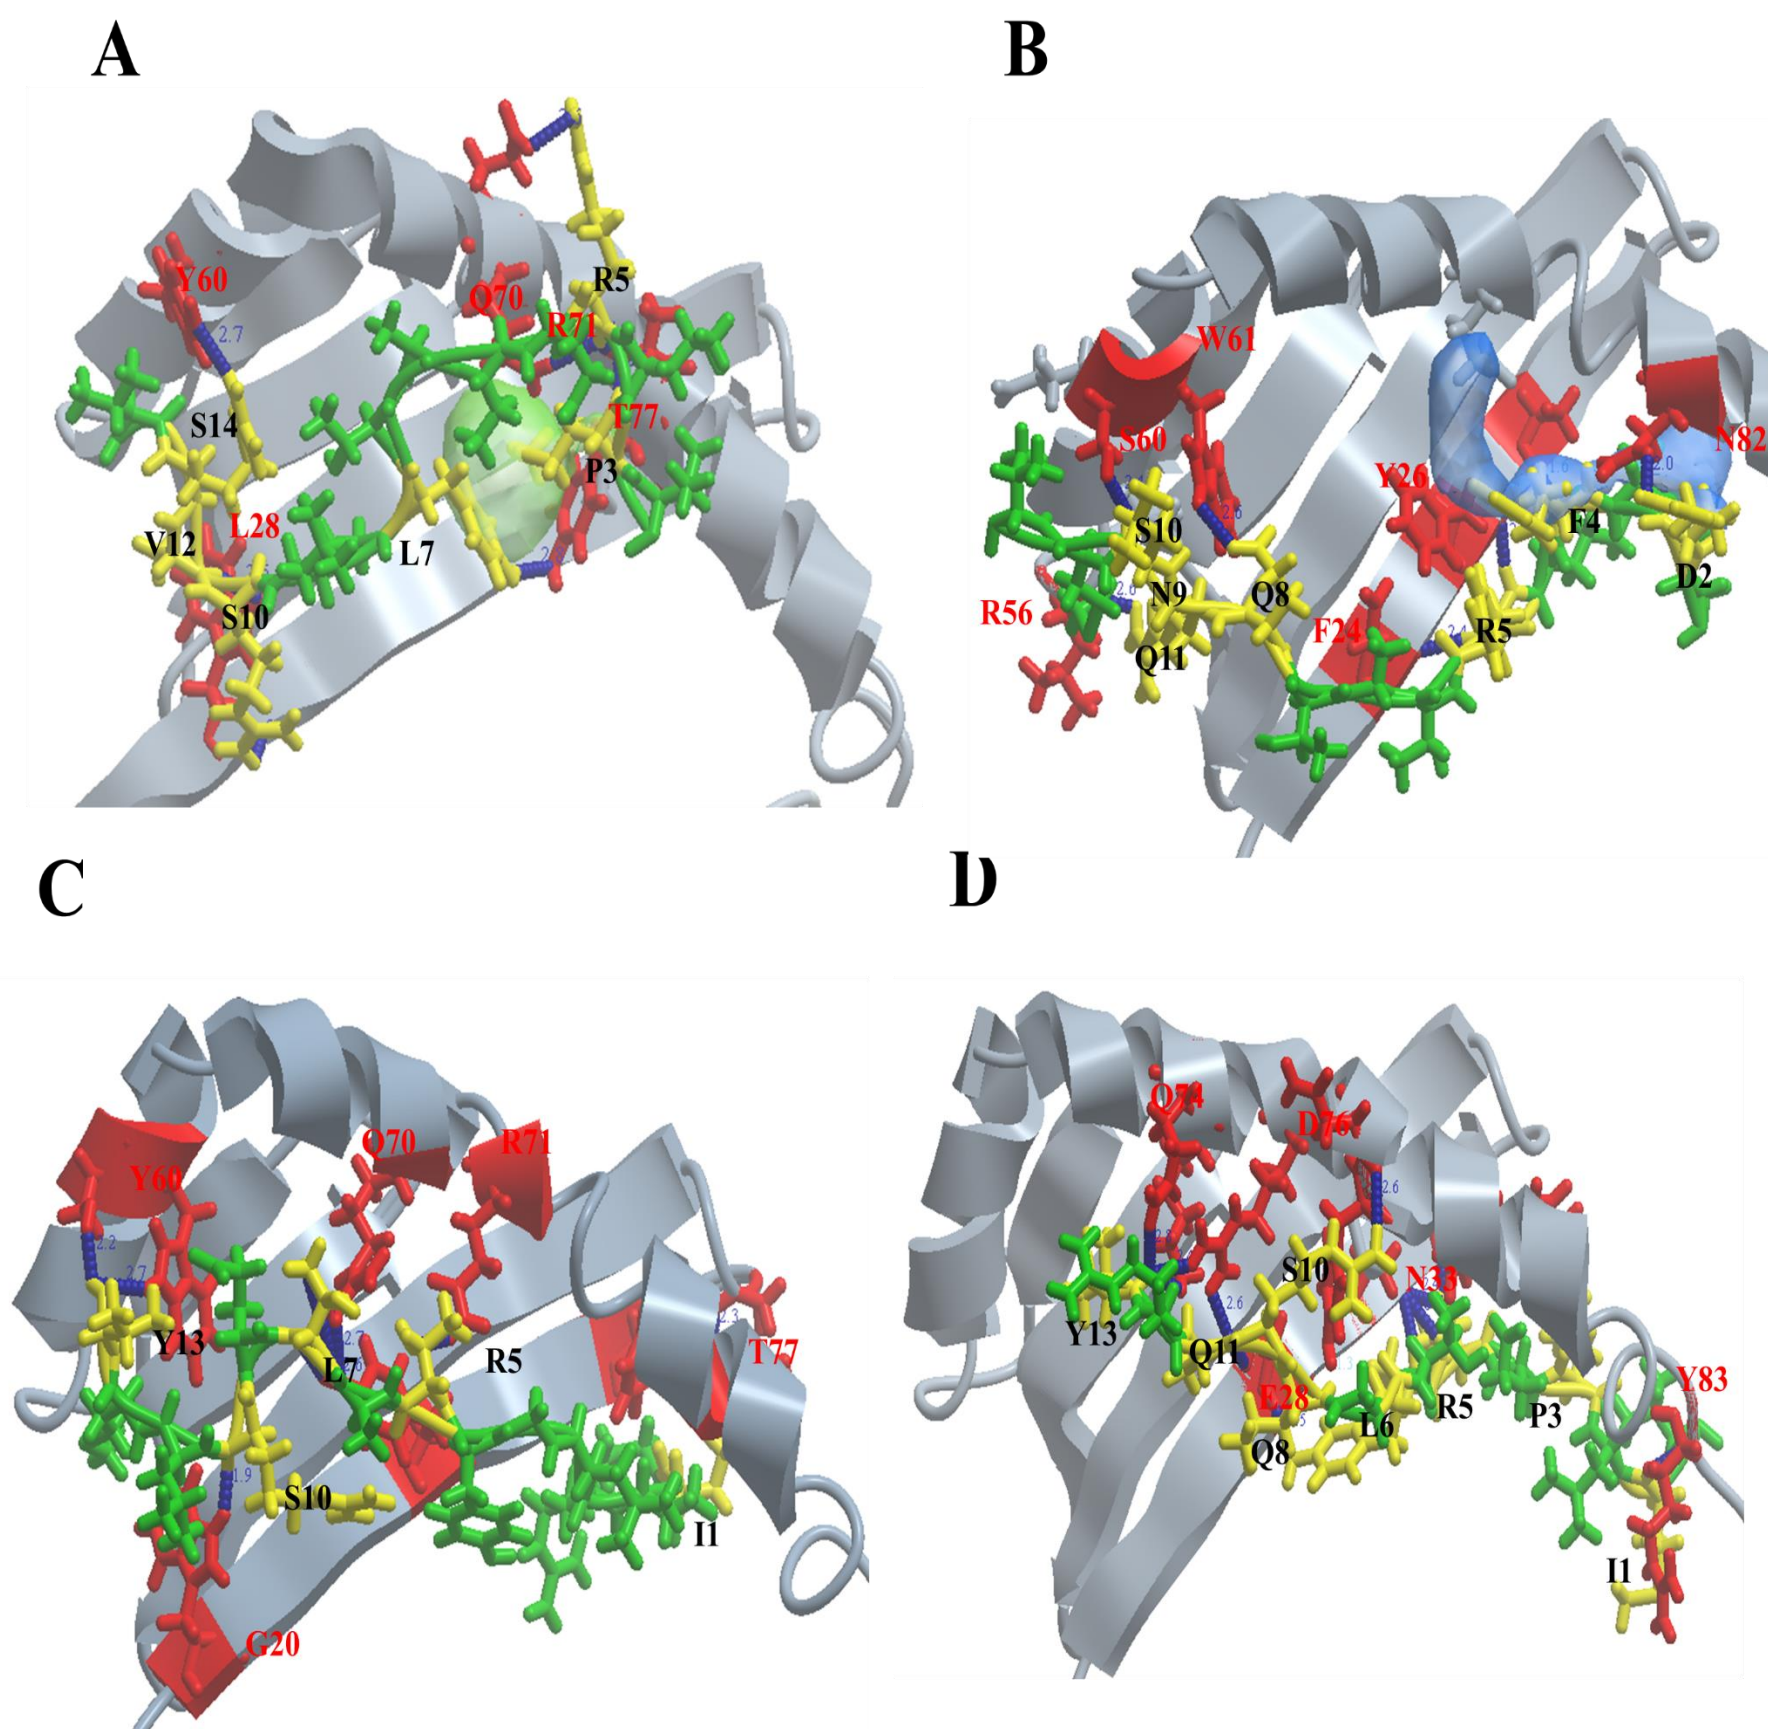

<sup>a</sup>MHC II structures are shown in grey ribbon and the amino acid residues involved in the H-bonding interaction are shown as red sticks and labeled red. The epitope is shown as in green ribbon and the amino acid residues involved in the H-bonding network are shown as yellow sticks and labeled black. MHC II binding pocket(s) are shown as electrostatic sphere. H-bonds are displayed as blue spheres and the H-bonding distances are labeled blue. H-bonding interaction between the amino acid residues of the epitope and those of the MHC II are detailed in additional file 7- Table S5.

**Additional file 7-Table S5:** Hydrogen Bonds and binding statistics of predicted strongest epitope 301-IDPFRLQLNSQVYSL-315 from IvAgNP with MHC II complexes<sup>a</sup>

| Epitope-MHC II complex | No. of H-bonds | Binding energy (kcal/mol) | Receptor residues in MHC I | Ligand residues in epitope | Interacting atoms | H-bond distance (Å) |
|------------------------|----------------|---------------------------|----------------------------|----------------------------|-------------------|---------------------|
| Epitope-HLA-DRB1*0101  | 9              | -194.87                   | T77                        | P3                         | H-O               | 2.15                |
|                        |                |                           | R71                        | R5                         | O-H               | 2.85                |
|                        |                |                           | Q70                        | R5                         | H-O               | 1.23                |
|                        |                |                           | R71                        | P3                         | H-O               | 1.54                |
|                        |                |                           | R71                        | L7                         | O-H               | 1.91                |
|                        |                |                           | Y60                        | S14                        | H-O               | 2.55                |
|                        |                |                           | L28                        | S10                        | O-H               | 2.41                |
|                        |                |                           | L28                        | S10                        | O-H               | 2.05                |
|                        |                |                           | L28                        | V12                        | O-H               | 2.16                |
| Epitope-HLA-DRB1*0901  | 9              | -211.17                   | N82                        | D2                         | H-O               | 1.41                |
|                        |                |                           | N82                        | F4                         | O-H               | 1.45                |
|                        |                |                           | H28                        | F4                         | H-O               | 2.18                |
|                        |                |                           | Y26                        | R5                         | O-H               | 2.48                |
|                        |                |                           | F24                        | R5                         | H-O               | 2.88                |
|                        |                |                           | W61                        | Q8                         | O-H               | 2.64                |
|                        |                |                           | S60                        | S10                        | H-O               | 2.14                |
|                        |                |                           | R56                        | N9                         | H-O               | 2.13                |
|                        |                |                           | R56                        | Q11                        | H-O               | 2.12                |
| Epitope-HLA-DRB1*0404  | 7              | -189.62                   | T77                        | I1                         | H-O               | 2.04                |
|                        |                |                           | R71                        | R5                         | H-O               | 2.16                |
|                        |                |                           | Q70                        | L7                         | O-H               | 2.28                |
|                        |                |                           | G20                        | S10                        | O-H               | 1.65                |
|                        |                |                           | Y60                        | Y13                        | H-O               | 1.88                |
|                        |                |                           | D28                        | R5                         | O-H               | 2.08                |
|                        |                |                           | D28                        | R5                         | O-H               | 2.06                |
| Epitope-HLA-DRB1*0701  | 8              | -185.42                   | Y83                        | I1                         | H-O               | 2.04                |
|                        |                |                           | N33                        | P3                         | O-H               | 2.12                |
|                        |                |                           | N33                        | R5                         | H-O               | 2.36                |
|                        |                |                           | D76                        | S10                        | O-H               | 2.08                |
|                        |                |                           | Q74                        | Y13                        | H-O               | 1.95                |
|                        |                |                           | Q74                        | Y13                        | H-O               | 2.26                |
|                        |                |                           | D76                        | Q11                        | O-H               | 2.35                |
|                        |                |                           | N33                        | L6                         | O-H               | 2.14                |

<sup>a</sup>Hydrogen bonding distance and binding energy were analyzed in Molsoft ICM-pro 3.5 computer program. Fifteen amino acid residues in the epitope (301-IDPFRLQLNSQVYSL-315) have been numbered 1-15.



**Additional file 8-Table S6:** Hydrogen Bonds and binding statistics of epitope 181-QQFIYAGSLSALLDP-195 from Ag85B with MHC I complexes <sup>a</sup>

| Epitope-MHC I complex                | No. of H-bonds | Binding energy (kcal/mol) | Receptor residues in MHC I | Ligand residues in epitope | Interacting atoms | H-bond distance (Å) |
|--------------------------------------|----------------|---------------------------|----------------------------|----------------------------|-------------------|---------------------|
| Epitope (183-FIYAGSLSA-191)-HLA-A2   | 8              | -162.01                   | H70                        | Y3                         | H-O               | 2.79                |
|                                      |                |                           | Y116                       | S8                         | H-O               | 2.66                |
|                                      |                |                           | W147                       | A9                         | H-O               | 2.58                |
|                                      |                |                           | Q155                       | S6                         | H-O               | 1.84                |
|                                      |                |                           | Y159                       | F1                         | H-O               | 1.92                |
|                                      |                |                           | E63                        | F1                         | O-H               | 2.70                |
|                                      |                |                           | Y99                        | Y3                         | O-H               | 2.11                |
|                                      |                |                           | Q155                       | S6                         | O-H               | 2.22                |
| Epitope (184-IYAGSLSAL-192)-HLA-A24  | 7              | -185.45                   | K66                        | Y2                         | H-O               | 2.18                |
|                                      |                |                           | N77                        | S7                         | H-O               | 1.75                |
|                                      |                |                           | Y84                        | L9                         | H-O               | 2.71                |
|                                      |                |                           | T143                       | L9                         | H-O               | 2.55                |
|                                      |                |                           | W147                       | A8                         | H-O               | 1.49                |
|                                      |                |                           | E63                        | I1                         | O-H               | 2.70                |
|                                      |                |                           | N77                        | L9                         | O-H               | 1.80                |
| Epitope (181-QQFIYAGS L-189)-HLA-B27 | 11             | -193.62                   | Y59                        | L9                         | H-O               | 2.61                |
|                                      |                |                           | R62                        | G7                         | H-O               | 2.07                |
|                                      |                |                           | R62                        | S8                         | H-O               | 1.95                |
|                                      |                |                           | Y99                        | Q1                         | H-O               | 1.83                |
|                                      |                |                           | T143                       | Q2                         | H-O               | 2.01                |
|                                      |                |                           | W147                       | S8                         | H-O               | 2.50                |
|                                      |                |                           | Y159                       | L9                         | H-O               | 2.35                |
|                                      |                |                           | Y171                       | Q1                         | H-O               | 2.14                |
|                                      |                |                           | E63                        | L9                         | O-H               | 2.05                |
|                                      |                |                           | D77                        | Q2                         | O-H               | 1.88                |
|                                      |                |                           | D116                       | Q1                         | O-H               | 2.41                |
| Epitope (181-QQFIYAGS L-189)-HLA-B44 | 11             | -200.13                   | Y9                         | Q2                         | H-O               | 1.81                |
|                                      |                |                           | R62                        | Q1                         | H-O               | 1.73                |
|                                      |                |                           | Y74                        | Y5                         | H-O               | 2.31                |
|                                      |                |                           | Y99                        | Q2                         | H-O               | 2.39                |
|                                      |                |                           | T143                       | S8                         | H-O               | 1.72                |
|                                      |                |                           | Y9                         | Q2                         | O-H               | 1.73                |
|                                      |                |                           | E63                        | Q1                         | O-H               | 1.90                |
|                                      |                |                           | E63                        | Q2                         | O-H               | 1.89                |
|                                      |                |                           | N77                        | L9                         | O-H               | 2.52                |
|                                      |                |                           | D116                       | Y5                         | O-H               | 2.66                |
|                                      |                |                           | S167                       | Q1                         | O-H               | 2.67                |
| Epitope (184-IYAGSLSAL-192)-HLA-B39  | 7              | 175.42                    | Y84                        | L9                         | H-O               | 2.28                |
|                                      |                |                           | K146                       | L9                         | H-O               | 2.44                |
|                                      |                |                           | W147                       | S7                         | H-O               | 2.79                |
|                                      |                |                           | W147                       | A8                         | H-O               | 1.82                |
|                                      |                |                           | S77                        | L9                         | O-H               | 1.97                |
|                                      |                |                           | Y99                        | Y2                         | O-H               | 2.24                |
|                                      |                |                           | E152                       | S5                         | O-H               | 2.31                |

<sup>a</sup>Hydrogen bonding distance and binding energy were analyzed in Molsoft ICM-pro 3.5 computer program. Nine amino acid residues in each 9-mer of epitope have been numbered 1-9.

**Additional file 9-Figure S3:** Docking of control epitope 380-ELRSRYWAIRTRSG-393 from IvAgNP with HLA-B8 (A) and B27 (B)<sup>a</sup>

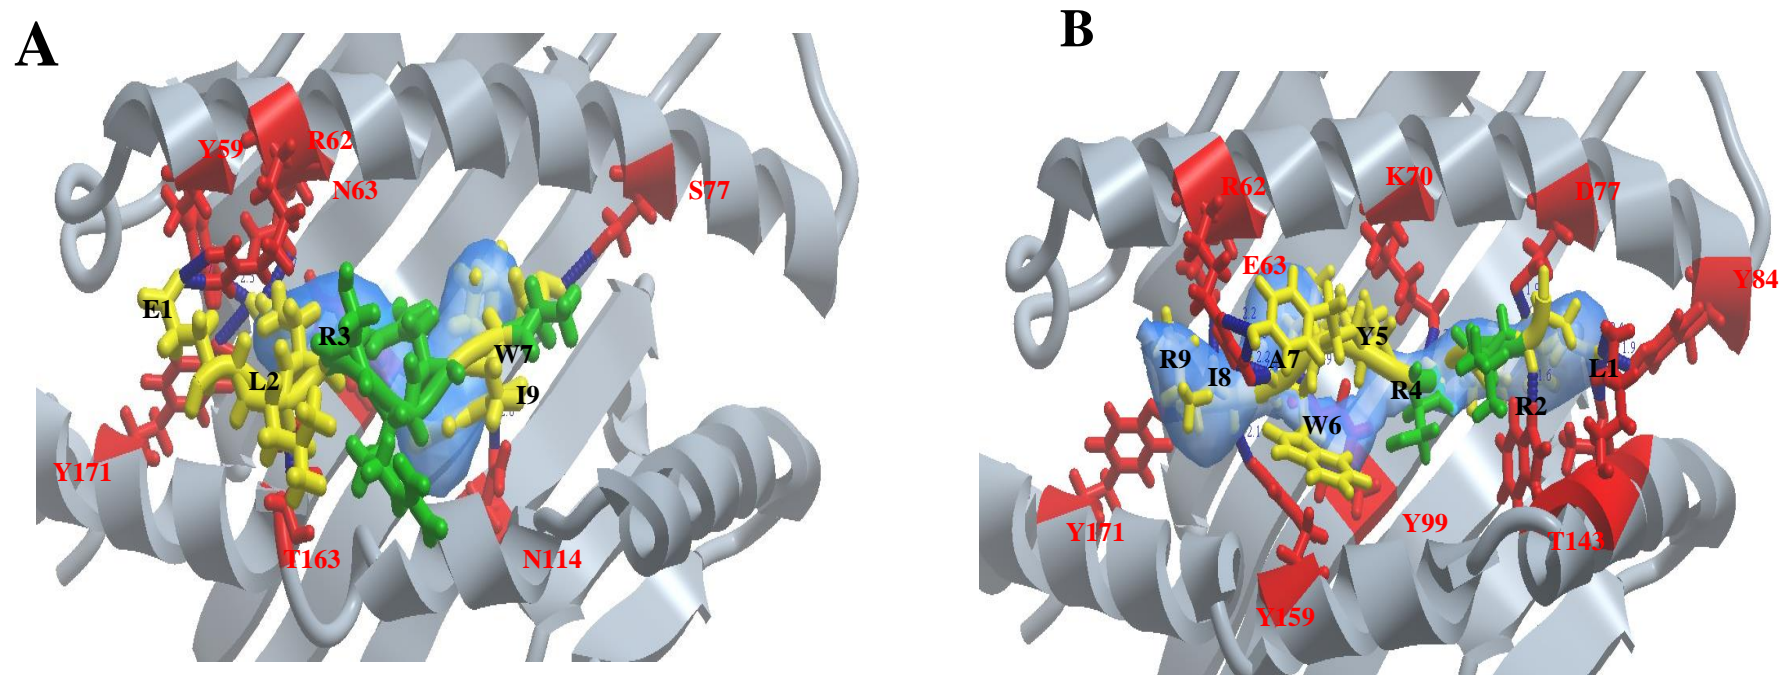

<sup>a</sup>MHC I structures are shown in grey ribbon and the amino acid residues involved in the H-bonding interaction are shown as red sticks and labeled red. The epitope is shown as in green ribbon and the amino acid residues involved in the H-bonding network are shown as yellow sticks and labeled black. MHC I binding pocket(s) are shown as electrostatic sphere. H-bonds are displayed as blue spheres and the H-bonding distances are labeled blue. H-bonding interaction between the amino acid residues of the epitope and those of the MHC I are detailed in additional file 10- Table S7

**Additional file 10-Table S7:** Hydrogen Bonds and binding statistics of control epitope 380-ELRSRYWAIRTRSG-393 from IvAgNP with MHC I complexes

| Epitope-MHC I complex               | No. of H-bonds | Binding energy (kcal/mol) | Receptor residues in MHC I | Ligand residues in epitope | Interacting atoms | H-bond distance (Å) |
|-------------------------------------|----------------|---------------------------|----------------------------|----------------------------|-------------------|---------------------|
| Epitope (380-ELRSRYWAI-388)-HLA-B8  | 10             | -177.86                   | R62                        | E1                         | H-O               | 2.42                |
|                                     |                |                           | R62                        | E1                         | H-O               | 1.74                |
|                                     |                |                           | S77                        | I9                         | H-O               | 2.57                |
|                                     |                |                           | T163                       | L2                         | H-O               | 2.13                |
|                                     |                |                           | Y7                         | R3                         | O-H               | 2.45                |
|                                     |                |                           | Y7                         | Y6                         | O-H               | 1.88                |
|                                     |                |                           | Y59                        | R3                         | O-H               | 2.29                |
|                                     |                |                           | N63                        | R3                         | O-H               | 2.22                |
|                                     |                |                           | N114                       | W7                         | O-H               | 2.67                |
|                                     |                |                           | Y171                       | R3                         | O-H               | 2.78                |
| Epitope (381-LRSRYWAIR-389)-HLA-B27 | 14             | -234.19                   | R62                        | Y5                         | H-O               | 2.25                |
|                                     |                |                           | R62                        | W6                         | H-O               | 2.15                |
|                                     |                |                           | R62                        | W6                         | H-O               | 2.36                |
|                                     |                |                           | R62                        | Y5                         | H-O               | 1.82                |
|                                     |                |                           | K70                        | R2                         | H-O               | 2.65                |
|                                     |                |                           | Y84                        | L1                         | H-O               | 1.95                |
|                                     |                |                           | T143                       | L1                         | H-O               | 2.38                |
|                                     |                |                           | W147                       | L1                         | H-O               | 1.56                |
|                                     |                |                           | Y159                       | A7                         | H-O               | 2.07                |
|                                     |                |                           | Y171                       | R9                         | H-O               | 1.89                |
|                                     |                |                           | E63                        | R9                         | O-H               | 2.75                |
|                                     |                |                           | D77                        | R2                         | O-H               | 1.92                |
|                                     |                |                           | Y99                        | R4                         | O-H               | 1.94                |
|                                     |                |                           | Y99                        | R4                         | O-H               | 2.43                |

<sup>a</sup>Hydrogen bonding distance and binding energy were analyzed in Molsoft ICM-pro 3.5 computer program. Nine amino acids in each 9-mer epitope have been numbered 1-9.

**Additional file 11-Figure S4:** Docking of predicted strongest epitope 301-IDPFRLLLQNSQVYSL-315 from IvAgNP with HLA-A2 (A), A3 (B), B27 (C), B39 (D) and B58 (E)<sup>a</sup>

**A**

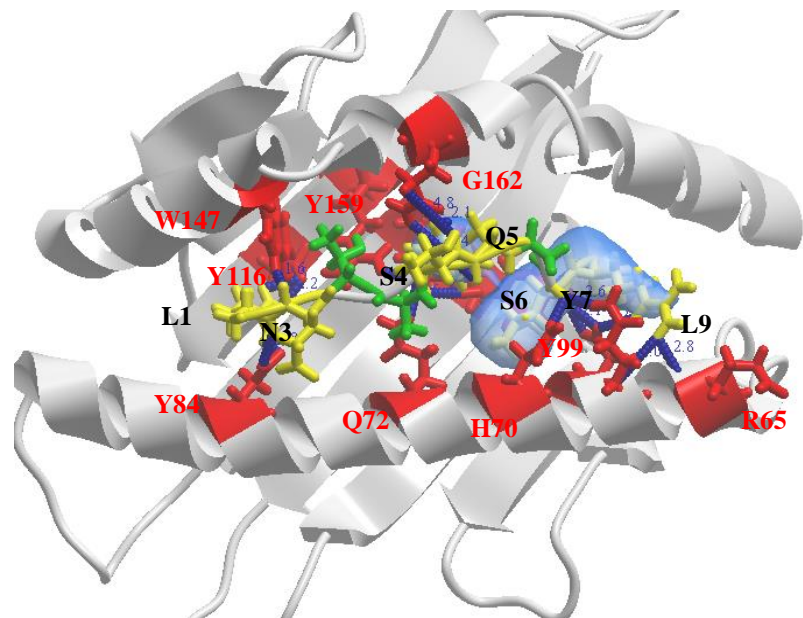

**B**

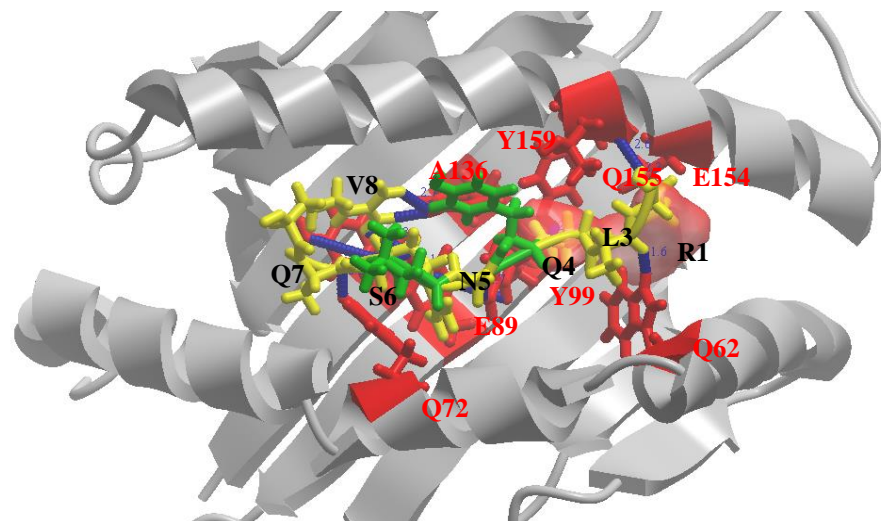

**C**

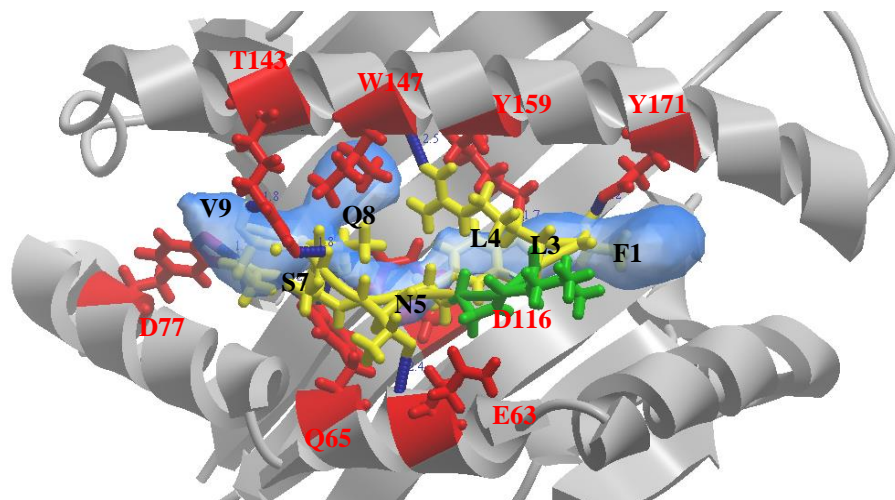

**D**

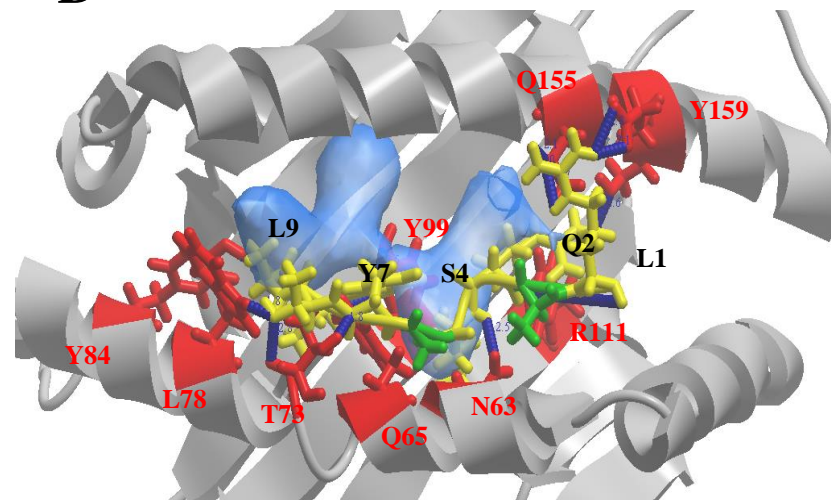

**E**

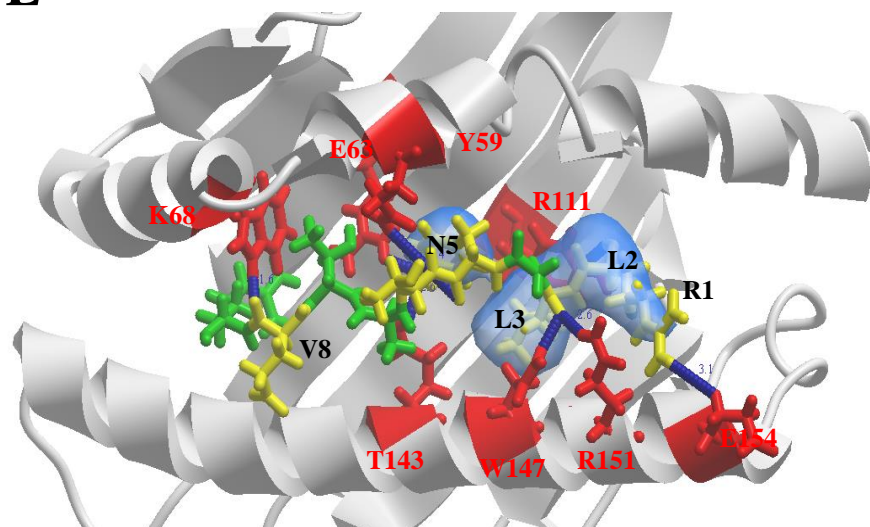



<sup>a</sup>MHC I structures are shown in grey ribbon and the amino acid residues involved in the H-bonding interaction are shown as red sticks and labeled red. The epitope is shown as in green ribbon and the amino acid residues involved in the H-bonding network are shown as yellow sticks and labeled black. MHC I binding pocket(s) are shown as electrostatic sphere. H-bonds are displayed as blue spheres and the H-bonding distances are labeled blue. H-bonding interaction between the amino acid residues of the epitope and those of the MHC I are detailed in additional file 12- Table S8

**Additional file 12-Table S8:** Hydrogen Bonds and binding statistics of predicted strongest epitope 301-IDPFRLQLNSQVYSL-315 from IvAgNP with MHC I complexes<sup>a</sup>

| Epitope-MHC I complex               | No. of H-bonds | Binding energy (kcal/mol) | Receptor residues in MHC I | Ligand residues in epitope | Interacting atoms | H-bond distance (Å) |
|-------------------------------------|----------------|---------------------------|----------------------------|----------------------------|-------------------|---------------------|
| Epitope (307-LQNSQVYSL-315)-HLA-A2  | 13             | -195.63                   | Q72                        | S4                         | H-O               | 2.79                |
|                                     |                |                           | Y116                       | L1                         | H-O               | 2.66                |
|                                     |                |                           | W147                       | Q2                         | H-O               | 2.58                |
|                                     |                |                           | Y159                       | S4                         | H-O               | 1.84                |
|                                     |                |                           | Y159                       | S4                         | H-O               | 1.92                |
|                                     |                |                           | R65                        | L9                         | O-H               | 2.70                |
|                                     |                |                           | Y99                        | Y7                         | O-H               | 2.11                |
|                                     |                |                           | Y159                       | S6                         | O-H               | 2.22                |
|                                     |                |                           | G162                       | Y7                         | O-H               | 2.13                |
|                                     |                |                           | Y84                        | N3                         | O-H               | 1.90                |
|                                     |                |                           | R65                        | L9                         | O-H               | 2.35                |
|                                     |                |                           | Y84                        | N3                         | H-O               | 2.40                |
|                                     |                |                           | H70                        | Y7                         | H-O               | 3.00                |
| Epitope (305-RLLQNSQVY-313)-HLA-A3  | 11             | -204.35                   | Q62                        | R1                         | H-O               | 2.18                |
|                                     |                |                           | Q72                        | N5                         | H-O               | 1.75                |
|                                     |                |                           | Q72                        | N5                         | H-O               | 2.71                |
|                                     |                |                           | Y159                       | L3                         | H-O               | 2.55                |
|                                     |                |                           | E154                       | L3                         | H-O               | 1.49                |
|                                     |                |                           | Y99                        | Q4                         | O-H               | 2.70                |
|                                     |                |                           | A136                       | S6                         | O-H               | 1.80                |
|                                     |                |                           | E89                        | Q7                         | H-O               | 1.68                |
|                                     |                |                           | E89                        | Q7                         | H-O               | 1.91                |
|                                     |                |                           | R108                       | V8                         | H-O               | 2.52                |
|                                     |                |                           | Q155                       | V8                         | H-O               | 2.10                |
| Epitope (304-FRLQNSQV-312)-HLA-B27  | 11             | -199.62                   | E63                        | N5                         | H-O               | 2.61                |
|                                     |                |                           | Y159                       | L4                         | H-O               | 2.07                |
|                                     |                |                           | Q65                        | N5                         | H-O               | 1.95                |
|                                     |                |                           | D77                        | V9                         | H-O               | 1.83                |
|                                     |                |                           | T143                       | V9                         | H-O               | 2.01                |
|                                     |                |                           | W147                       | Q8                         | H-O               | 2.50                |
|                                     |                |                           | Y159                       | L4                         | H-O               | 2.35                |
|                                     |                |                           | Y171                       | F1                         | H-O               | 2.14                |
|                                     |                |                           | E63                        | L9                         | O-H               | 2.40                |
|                                     |                |                           | D116                       | L3                         | O-H               | 1.88                |
|                                     |                |                           | D116                       | L3                         | O-H               | 2.41                |
| Epitope (307-LQNSQVYSL-315)-HLA-B39 | 10             | -191.13                   | R111                       | L1                         | H-O               | 1.81                |
|                                     |                |                           | N63                        | S4                         | H-O               | 2.51                |
|                                     |                |                           | Y99                        | Y7                         | H-O               | 2.31                |
|                                     |                |                           | Y99                        | S4                         | H-O               | 2.39                |
|                                     |                |                           | Y159                       | Q2                         | H-O               | 1.72                |
|                                     |                |                           | Q155                       | Q2                         | O-H               | 1.73                |
|                                     |                |                           | Q65                        | Y7                         | O-H               | 1.90                |
|                                     |                |                           | T73                        | Y7                         | O-H               | 2.61                |
|                                     |                |                           | Y84                        | L9                         | O-H               | 2.52                |
|                                     |                |                           | L78                        | L9                         | O-H               | 2.66                |
|                                     |                |                           | T73                        | Y7                         | O-H               | 2.67                |
| Epitope (305-RLLQNSQVY-313)-HLA-B58 | 9              | -185.32                   | E154                       | R1                         | H-O               | 3.11                |
|                                     |                |                           | R151                       | L2                         | H-O               | 2.61                |
|                                     |                |                           | W147                       | L3                         | H-O               | 2.64                |
|                                     |                |                           | R111                       | L2                         | H-O               | 1.82                |
|                                     |                |                           | T143                       | N5                         | O-H               | 1.63                |
|                                     |                |                           | K68                        | V8                         | O-H               | 2.24                |
|                                     |                |                           | E63                        | N5                         | O-H               | 2.31                |
|                                     |                |                           | Y59                        | N5                         | H-O               | 1.70                |
|                                     |                |                           | E63                        | N5                         | H-O               | 1.61                |

<sup>a</sup>Hydrogen bonding distance and binding energy were analyzed in Molsoft ICM-pro 3.5 computer program. Nine amino acids in each 9-mer epitope have been numbered 1-9.

**Additional file 13-Figure S5: Multiple alignments of amino acid sequences of HLA-A and HLA-B series**

|         |                        |                                            |          |          |                                    |
|---------|------------------------|--------------------------------------------|----------|----------|------------------------------------|
|         |                        | 59                                         |          | 84       |                                    |
| HLA-A02 | GSHSMRYFFTSVSRPGRGEPRI | <u>AVGYVDDTQFVRFSDAASQRMEPRAPWIEQEGPHE</u> | <u>Y</u> | <u>W</u> | TRKVKAHQSQTDRVDLGTLRGYYNQSE 89     |
| HLA-A24 | GSHSMRYFFTSVSRPGRGEPRI | <u>AVGYVDDTQFVRFSDAASQRMEPRAPWIEQEGPHE</u> | <u>Y</u> | <u>W</u> | ETGKVKAHQSQTDRNLRIALRYYNQSE 89     |
| HLA-A11 | GSHSMRYFFTSVSRPGRGEPRI | <u>AVGYVDDTQFVRFSDAASQRMEPRAPWIEQEGPHE</u> |          |          | WDQETRNVKAQSQTDRVDLGTLRGYYNQSE 89  |
| HLA-A25 | GSHSMRYFFTSVSRPGRGEPRI | <u>AVGYVDDTQFVRFSDAASQRMEPRAPWIEQEGPHE</u> |          |          | WDRNTRNVKAHSQTDRESLRIALRYYNQSE 89  |
| HLA-A36 | GSHSMRYFFTSVSRPGRGEPRI | <u>AVGYVDDTQFVRFSDAASQRMEPRAPWIEQEGPHE</u> |          |          | WDQETRNMKAHSQTDRLNLTGLTRGYYNQSE 89 |
| HLA-A33 | GSHSMRYFFTSVSRPGRGEPRI | <u>AVGYVDDTQFVRFSDAASQRMEPRAPWIEQEGPHE</u> |          |          | WDRNTRNVKAHSQIDRVDLGTLRGYYNQSE 89  |
| HLA-A32 | GSHSMRYFFTSVSRPGRGEPRI | <u>AVGYVDDTQFVRFSDAASQRMEPRAPWIEQEGPHE</u> |          |          | WDQETRNVKAHSQTDRESLRIALRYYNQSE 89  |
| HLA-A31 | GSHSMRYFFTSVSRPGRGEPRI | <u>AVGYVDDTQFVRFSDAASQRMEPRAPWIEQEGPHE</u> |          |          | WDQETRNVKAHSQIDRVDLGTLRGYYNQSE 89  |
| HLA-A30 | GSHSMRYFFTSVSRPGRGEPRI | <u>AVGYVDDTQFVRFSDAASQRMEPRAPWIEQEGPHE</u> |          |          | WDQETRNVKAQSQTDRVDLGTLRGYYNQSE 89  |
| HLA-A29 | GSHSMRYFFTSVSRPGRGEPRI | <u>AVGYVDDTQFVRFSDAASQRMEPRAPWIEQEGPHE</u> |          |          | WDLQTRNVKAQSQTDRANLGTLRGYYNQSE 89  |
| HLA-A74 | GSHSMRYFFTSVSRPGRGEPRI | <u>AVGYVDDTQFVRFSDAASQRMEPRAPWIEQEGPHE</u> |          |          | WDQETRNVKAHSQTDRLVLTGLTRGYYNQSE 89 |
| HLA-A68 | GSHSMRYFFTSVSRPGRGEPRI | <u>AVGYVDDTQFVRFSDAASQRMEPRAPWIEQEGPHE</u> |          |          | WDRNTRNVKAQSQTDRVDLGTLRGYYNQSE 89  |
| HLA-A01 | GSHSMRYFFTSVSRPGRGEPRI | <u>AVGYVDDTQFVRFSDAASQRMEPRAPWIEQEGPHE</u> |          |          | WDQETRNMKAHSQTDRLNLTGLTRGYYNQSE 89 |
| HLA-A03 | GSHSMRYFFTSVSRPGRGEPRI | <u>AVGYVDDTQFVRFSDAASQRMEPRAPWIEQEGPHE</u> |          |          | WDQETRNVKAQSQTDRVDLGTLRGYYNQSE 89  |
| HLA-A34 | GSHSMRYFFTSVSRPGRGEPRI | <u>AVGYVDDTQFVRFSDAASQRMEPRAPWIEQEGPHE</u> |          |          | WDRNTRNVKAQSQTDRVDLGTLRGYYNQSE 89  |
| HLA-A26 | GSHSMRYFFTSVSRPGRGEPRI | <u>AVGYVDDTQFVRFSDAASQRMEPRAPWIEQEGPHE</u> |          |          | WDRNTRNVKAHSQTDRLNLTGLTRGYYNQSE 89 |
| HLA-B27 | GSHSMRYFFTSVSRPGRGEPRI | <u>AVGYVDDTQFVRFSDAASPREPRAPWIEQEGPHE</u>  | <u>Y</u> | <u>W</u> | NDRETIQICKAKAQTDREDLRLLRYYNQSE 89  |
| HLA-B44 | GSHSMRYFFTSVSRPGRGEPRI | <u>AVGYVDDTQFVRFSDAASPRMAPRAPWIEQEGPHE</u> | <u>Y</u> | <u>W</u> | NDRETIQISKTNTQTYRENLRNLRYYNQSE 89  |
| HLA-B78 | GSHSMRYFFTSVSRPGRGEPRI | <u>AVGYVDDTQFVRFSDAASPRTEPRAPWIEQEGPHE</u> |          |          | WDRNTQIFKTNTQTDRESLRNLRYYNQSE 89   |
| HLA-B67 | GSHSMRYFFTSVSRPGRGEPRI | <u>AVGYVDDTQFVRFSDAASPREPRAPWIEQEGPHE</u>  |          |          | WDRNTQIYKAQAQTDRESLRNLRYYNQSE 89   |
| HLA-B58 | GSHSMRYFFTSVSRPGRGEPRI | <u>AVGYVDDTQFVRFSDAASPRTEPRAPWIEQEGPHE</u> |          |          | WDGETRNMKASAQTYRENLRIALRYYNQSE 89  |
| HLA-B57 | GSHSMRYFFTSVSRPGRGEPRI | <u>AVGYVDDTQFVRFSDAASPRTEPRAPWIEQEGPHE</u> |          |          | WDRNTQIFKTNTQTYRENLRIALRYYNQSE 89  |
| HLA-B53 | GSHSMRYFFTSVSRPGRGEPRI | <u>AVGYVDDTQFVRFSDAASPRTEPRAPWIEQEGPHE</u> |          |          | WDRNTQIFKTNTQTYRENLRIALRYYNQSE 89  |
| HLA-B52 | GSHSMRYFFTSVSRPGRGEPRI | <u>AVGYVDDTQFVRFSDAASPRTEPRAPWIEQEGPHE</u> |          |          | WDRETQISKTNTQTYRENLRIALRYYNQSE 89  |
| HLA-B51 | GSHSMRYFFTSVSRPGRGEPRI | <u>AVGYVDDTQFVRFSDAASPRTEPRAPWIEQEGPHE</u> |          |          | WDRNTQIFKTNTQTYRENLRIALRYYNQSE 89  |
| HLA-B46 | GSHSMRYFFTSVSRPGRGEPRI | <u>AVGYVDDTQFVRFSDAASPRMAPRAPWIEQEGPHE</u> |          |          | WDRETQYKQKRAQTDRLVLRNLRYYNQSE 89   |
| HLA-B41 | GSHSMRYFFTSVSRPGRGEPRI | <u>AVGYVDDTQFVRFSDAASPRKEPRAPWIEQEGPHE</u> |          |          | WDRETQISKTNTQTYRESLRNLRYYNQSE 89   |
| HLA-B38 | GSHSMRYFFTSVSRPGRGEPRI | <u>AVGYVDDTQFVRFSDAASPREPRAPWIEQEGPHE</u>  |          |          | WDRNTQICKTNTQTYRENLRIALRYYNQSE 89  |
| HLA-B35 | GSHSMRYFFTSVSRPGRGEPRI | <u>AVGYVDDTQFVRFSDAASPRTEPRAPWIEQEGPHE</u> |          |          | WDRNTQIFKTNTQTYRESLRNLRYYNQSE 89   |
| HLA-B18 | GSHSMRYFFTSVSRPGRGEPRI | <u>AVGYVDDTQFVRFSDAASPRMAPRAPWIEQEGPHE</u> |          |          | WDRNTQISKTNTQTYRESLRNLRYYNQSE 89   |
| HLA-B15 | GSHSMRYFFTSVSRPGRGEPRI | <u>AVGYVDDTQFVRFSDAASPRMAPRAPWIEQEGPHE</u> |          |          | WDRETQISKTNTQTYRESLRNLRYYNQSE 89   |
| HLA-B13 | GSHSMRYFFTSVSRPGRGEPRI | <u>AVGYVDDTQFVRFSDAASPRMAPRAPWIEQEGPHE</u> |          |          | WDRETQISKTNTQTYRENLRNLRYYNQSE 89   |
| HLA-B39 | GSHSMRYFFTSVSRPGRGEPRI | <u>AVGYVDDTQFVRFSDAASPREPRAPWIEQEGPHE</u>  |          |          | WDRNTQICKTNTQTDRESLRNLRYYNQSE 89   |
| HLA-B73 | GSHSMRYFFTSVSRPGRGEPRI | <u>AVGYVDDTQFVRFSDAASPRMAPRAPWIEQEGPHE</u> |          |          | WDRNTQICKAKAQTDRLVLRNLRYYNQSE 89   |
| HLA-B08 | GSHSMRYFFTSVSRPGRGEPRI | <u>AVGYVDDTQFVRFSDAASPREPRAPWIEQEGPHE</u>  |          |          | WDRNTQIFKTNTQTDRESLRNLRYYNQSE 89   |
| HLA-B07 | GSHSMRYFFTSVSRPGRGEPRI | <u>AVGYVDDTQFVRFSDAASPREPRAPWIEQEGPHE</u>  |          |          | WDRNTQIYKAQAQTDRESLRNLRYYNQSE 89   |
| HLA-B40 | GSHSMRYFFTSVSRPGRGEPRI | <u>AVGYVDDTQFVRFSDAASPRKEPRAPWIEQEGPHE</u> |          |          | WDRETQISKTNTQTYRESLRNLRYYNQSE 89   |
| HLA-B54 | GSHSMRYFFTSVSRPGRGEPRI | <u>AVGYVDDTQFVRFSDAASPRMAPRAPWIEQEGPHE</u> |          |          | WDRNTQIYKAQAQTDRESLRNLRYYNQSE 89   |
| HLA-B55 | GSHSMRYFFTSVSRPGRGEPRI | <u>AVGYVDDTQFVRFSDAASPREPRAPWIEQEGPHE</u>  |          |          | WDRNTQIYKAQAQTDRESLRNLRYYNQSE 89   |
| HLA-B56 | GSHSMRYFFTSVSRPGRGEPRI | <u>AVGYVDDTQFVRFSDAASPREPRAPWIEQEGPHE</u>  |          |          | WDRNTQIYKAQAQTDRESLRNLRYYNQSE 89   |
| HLA-B15 | GSHSMRYFFTSVSRPGRGEPRI | <u>AVGYVDDTQFVRFSDAASPRMAPRAPWIEQEGPHE</u> |          |          | WDRETQISKTNTQTYRESLRNLRYYNQSE 89   |

|         |                  |                                                  |          |          |          |          |          |                                  |
|---------|------------------|--------------------------------------------------|----------|----------|----------|----------|----------|----------------------------------|
|         |                  | 99                                               |          | 143      | 147      | 155      | 159      |                                  |
| HLA-A02 | AGSHTVQRMYGCDVGS | <u>DRFLRGYHQAYDGKDYIALKEDLRSWTAADMAAQITTKHK</u>  | <u>W</u> | <u>Q</u> | <u>E</u> | <u>A</u> | <u>A</u> | VAEQLRAYLEGTCVEWLRRYLENGKETL 179 |
| HLA-A24 | AGSHTLQMMYGC     | <u>DRFLRGYHQAYDGKDYIALKEDLRSWTAADMAAQITTKRK</u>  | <u>W</u> | <u>Q</u> | <u>E</u> | <u>A</u> | <u>A</u> | VAEQLRAYLEGTCVGLRRYLENGKETL 179  |
| HLA-A11 | DGSHTIQIMYGCDV   | <u>GRFLRGYRQDAYDGKDYIALNEDLRSWTAADMAAQITTKRK</u> | <u>W</u> | <u>Q</u> | <u>E</u> | <u>A</u> | <u>A</u> | HAEQLRAYLEGRCVEWLRRYLENGKETL 179 |
| HLA-A25 | DGSHTIQIRMYGCD   | <u>GRFLRGYRQDAYDGKDYIALNEDLRSWTAADMAAQITTKRK</u> | <u>W</u> | <u>Q</u> | <u>E</u> | <u>A</u> | <u>A</u> | HAEQLRAYLEGRCVEWLRRYLENGKETL 179 |
| HLA-A36 | DGSHTIQIMYGCD    | <u>GRFLRGYRQDAYDGKDYIALNEDLRSWTAADMAAQITTKRK</u> | <u>W</u> | <u>Q</u> | <u>E</u> | <u>A</u> | <u>A</u> | HAEQLRAYLEGTCVEWLRRYLENGKETL 179 |
| HLA-A33 | AGSHTIQIMYGCD    | <u>GRFLRGYRQDAYDGKDYIALNEDLRSWTAADMAAQITTKRK</u> | <u>W</u> | <u>Q</u> | <u>E</u> | <u>A</u> | <u>A</u> | HAEQLRAYLEGTCVEWLRRHLENGKETL 179 |
| HLA-A32 | AGSHTIQIMYGCD    | <u>GRFLRGYRQDAYDGKDYIALNEDLRSWTAADMAAQITTKRK</u> | <u>W</u> | <u>Q</u> | <u>E</u> | <u>A</u> | <u>A</u> | HAEQLRAYLEGTCVEWLRRYLENGKETL 179 |
| HLA-A31 | AGSHTIQIMYGCD    | <u>GRFLRGYRQDAYDGKDYIALNEDLRSWTAADMAAQITTKRK</u> | <u>W</u> | <u>Q</u> | <u>E</u> | <u>A</u> | <u>A</u> | HAEQLRAYLEGTCVEWLRRYLENGKETL 179 |
| HLA-A30 | AGSHTIQIMYGCD    | <u>GRFLRGYRQDAYDGKDYIALNEDLRSWTAADMAAQITTKRK</u> | <u>W</u> | <u>Q</u> | <u>E</u> | <u>A</u> | <u>A</u> | HAEQLRAYLEGTCVEWLRRYLENGKETL 179 |
| HLA-A29 | AGSHTIQIMYGCD    | <u>GRFLRGYRQDAYDGKDYIALNEDLRSWTAADMAAQITTKRK</u> | <u>W</u> | <u>Q</u> | <u>E</u> | <u>A</u> | <u>A</u> | HAEQLRAYLEGTCVEWLRRYLENGKETL 179 |
| HLA-A74 | AGSHTIQIMYGCD    | <u>GRFLRGYRQDAYDGKDYIALNEDLRSWTAADMAAQITTKRK</u> | <u>W</u> | <u>Q</u> | <u>E</u> | <u>A</u> | <u>A</u> | HAEQLRAYLEGTCVEWLRRYLENGKETL 179 |
| HLA-A68 | AGSHTIQIMYGCD    | <u>GRFLRGYRQDAYDGKDYIALKEDLRSWTAADMAAQITTKHK</u> | <u>W</u> | <u>Q</u> | <u>E</u> | <u>A</u> | <u>A</u> | VAEQLRAYLEGTCVEWLRRYLENGKETL 179 |
| HLA-A01 | DGSHTIQIMYGCD    | <u>GRFLRGYRQDAYDGKDYIALNEDLRSWTAADMAAQITTKRK</u> | <u>W</u> | <u>Q</u> | <u>E</u> | <u>A</u> | <u>A</u> | HAEQLRAYLEGRCVGLRRYLENGKETL 179  |
| HLA-A03 | AGSHTIQIMYGCD    | <u>GRFLRGYRQDAYDGKDYIALNEDLRSWTAADMAAQITTKRK</u> | <u>W</u> | <u>Q</u> | <u>E</u> | <u>A</u> | <u>A</u> | HAEQLRAYLDGTCVEWLRRYLENGKETL 179 |
| HLA-A34 | DGSHTIQIRMYGCD   | <u>GRFLRGYRQDAYDGKDYIALNEDLRSWTAADMAAQITTKRK</u> | <u>W</u> | <u>Q</u> | <u>E</u> | <u>A</u> | <u>A</u> | HAEQLRAYLEGTCVEWLRRYLENGKETL 179 |
| HLA-A26 | DGSHTIQIRMYGCD   | <u>GRFLRGYRQDAYDGKDYIALNEDLRSWTAADMAAQITTKRK</u> | <u>W</u> | <u>Q</u> | <u>E</u> | <u>A</u> | <u>A</u> | HAEQLRAYLEGRCVEWLRRYLENGKETL 179 |
| HLA-B27 | AGSHTLQMMYGC     | <u>DRFLRGYHQAYDGKDYIALNEDLRSWTAADMAAQITTKRK</u>  | <u>W</u> | <u>Q</u> | <u>E</u> | <u>A</u> | <u>A</u> | HAEQLRAYLEGTCVEWLRRYLENGKETL 179 |
| HLA-B44 | AGSHIQIRMYGCD    | <u>GRFLRGYRQDAYDGKDYIALNEDLRSWTAADMAAQITTKRK</u> | <u>W</u> | <u>Q</u> | <u>E</u> | <u>A</u> | <u>A</u> | HAEQLRAYLEGTCVEWLRRYLENGKETL 179 |
| HLA-B78 | AGSHTWQIMYGCD    | <u>GRFLRGYRQDAYDGKDYIALNEDLRSWTAADMAAQITTKRK</u> | <u>W</u> | <u>Q</u> | <u>E</u> | <u>A</u> | <u>A</u> | HAEQLRAYLEGTCVEWLRRHLENGKETL 179 |
| HLA-B67 | AGSHTLQRMYGCD    | <u>GRFLRGYRQDAYDGKDYIALNEDLRSWTAADMAAQITTKRK</u> | <u>W</u> | <u>Q</u> | <u>E</u> | <u>A</u> | <u>A</u> | HAEQLRAYLEGTCVEWLRRYLENGKETL 179 |
| HLA-B58 | AGSHIQIRMYGCD    | <u>GRFLRGYRQDAYDGKDYIALNEDLRSWTAADMAAQITTKRK</u> | <u>W</u> | <u>Q</u> | <u>E</u> | <u>A</u> | <u>A</u> | HAEQLRAYLEGTCVEWLRRYLENGKETL 179 |
| HLA-B57 | AGSHIQIRMYGCD    | <u>GRFLRGYRQDAYDGKDYIALNEDLRSWTAADMAAQITTKRK</u> | <u>W</u> | <u>Q</u> | <u>E</u> | <u>A</u> | <u>A</u> | HAEQLRAYLEGTCVEWLRRYLENGKETL 179 |
| HLA-B53 | AGSHIQIRMYGCD    | <u>GRFLRGYRQDAYDGKDYIALNEDLRSWTAADMAAQITTKRK</u> | <u>W</u> | <u>Q</u> | <u>E</u> | <u>A</u> | <u>A</u> | HAEQLRAYLEGTCVEWLRRYLENGKETL 179 |
| HLA-B52 | AGSHTWQIMYGCD    | <u>GRFLRGYRQDAYDGKDYIALNEDLRSWTAADMAAQITTKRK</u> | <u>W</u> | <u>Q</u> | <u>E</u> | <u>A</u> | <u>A</u> | HAEQLRAYLEGTCVEWLRRHLENGKETL 179 |
| HLA-B51 | AGSHTWQIMYGCD    | <u>GRFLRGYRQDAYDGKDYIALNEDLRSWTAADMAAQITTKRK</u> | <u>W</u> | <u>Q</u> | <u>E</u> | <u>A</u> | <u>A</u> | HAEQLRAYLEGTCVEWLRRHLENGKETL 179 |
| HLA-B46 | AGSHTLQRMYGCD    | <u>GRFLRGYRQDAYDGKDYIALNEDLRSWTAADMAAQITTKRK</u> | <u>W</u> | <u>Q</u> | <u>E</u> | <u>A</u> | <u>A</u> | HAEQLRAYLEGTCVEWLRRYLENGKETL 179 |
| HLA-B41 | AGSHTWQIMYGCD    | <u>GRFLRGYRQDAYDGKDYIALNEDLRSWTAADMAAQITTKRK</u> | <u>W</u> | <u>Q</u> | <u>E</u> | <u>A</u> | <u>A</u> | HAEQLRAYLEGTCVEWLRRYLENGKETL 179 |
| HLA-B38 | AGSHTLQRMYGCD    | <u>GRFLRGYRQDAYDGKDYIALNEDLRSWTAADMAAQITTKRK</u> | <u>W</u> | <u>Q</u> | <u>E</u> | <u>A</u> | <u>A</u> | HAEQLRAYLEGTCVEWLRRYLENGKETL 179 |
| HLA-B35 | AGSHIQIRMYGCD    | <u>GRFLRGYRQDAYDGKDYIALNEDLRSWTAADMAAQITTKRK</u> | <u>W</u> | <u>Q</u> | <u>E</u> | <u>A</u> | <u>A</u> | HAEQLRAYLEGTCVEWLRRYLENGKETL 179 |
| HLA-B18 | AGSHTLQRMYGCD    | <u>GRFLRGYRQDAYDGKDYIALNEDLRSWTAADMAAQITTKRK</u> | <u>W</u> | <u>Q</u> | <u>E</u> | <u>A</u> | <u>A</u> | HAEQLRAYLEGTCVEWLRRHLENGKETL 179 |
| HLA-B15 | AGSHTLQRMYGCD    | <u>GRFLRGYRQDAYDGKDYIALNEDLRSWTAADMAAQITTKRK</u> | <u>W</u> | <u>Q</u> | <u>E</u> | <u>A</u> | <u>A</u> | HAEQLRAYLEGTCVEWLRRYLENGKETL 179 |
| HLA-B13 | AGSHIQIRMYGCD    | <u>GRFLRGYRQDAYDGKDYIALNEDLRSWTAADMAAQITTKRK</u> | <u>W</u> | <u>Q</u> | <u>E</u> | <u>A</u> | <u>A</u> | HAEQLRAYLEGTCVEWLRRYLENGKETL 179 |
| HLA-B39 | AGSHTLQRMYGCD    | <u>GRFLRGYRQDAYDGKDYIALNEDLRSWTAADMAAQITTKRK</u> | <u>W</u> | <u>Q</u> | <u>E</u> | <u>A</u> | <u>A</u> | HAEQLRAYLEGTCVEWLRRYLENGKETL 179 |
| HLA-B73 | DGSHTWQIMYGCD    | <u>GRFLRGYRQDAYDGKDYIALNEDLRSWTAADMAAQITTKRK</u> | <u>W</u> | <u>Q</u> | <u>E</u> | <u>A</u> | <u>A</u> | HAEQLRAYLEGTCVEWLRRHLENGKETL 179 |
| HLA-B08 | AGSHTLQSMYGCD    | <u>GRFLRGYRQDAYDGKDYIALNEDLRSWTAADMAAQITTKRK</u> | <u>W</u> | <u>Q</u> | <u>E</u> | <u>A</u> | <u>A</u> | HAEQLRAYLEGTCVEWLRRYLENGKETL 179 |
| HLA-B07 | AGSHTLQSMYGCD    | <u>GRFLRGYRQDAYDGKDYIALNEDLRSWTAADMAAQITTKRK</u> | <u>W</u> | <u>Q</u> | <u>E</u> | <u>A</u> | <u>A</u> | HAEQLRAYLEGTCVEWLRRYLENGKETL 179 |
| HLA-B40 | AGSHTLQSMYGCD    | <u>GRFLRGYRQDAYDGKDYIALNEDLRSWTAADMAAQITTKRK</u> | <u>W</u> | <u>Q</u> | <u>E</u> | <u>A</u> | <u>A</u> | HAEQLRAYLEGTCVEWLRRYLENGKETL 179 |
| HLA-B54 | AGSHTWQIMYGCD    | <u>GRFLRGYRQDAYDGKDYIALNEDLRSWTAADMAAQITTKRK</u> | <u>W</u> | <u>Q</u> | <u>E</u> | <u>A</u> | <u>A</u> | HAEQLRAYLEGTCVEWLRRYLENGKETL 179 |
| HLA-B55 | AGSHTWQIMYGCD    | <u>GRFLRGYRQDAYDGKDYIALNEDLRSWTAADMAAQITTKRK</u> | <u>W</u> | <u>Q</u> | <u>E</u> | <u>A</u> | <u>A</u> | HAEQLRAYLEGTCVEWLRRYLENGKETL 179 |
| HLA-B56 | AGSHTWQIMYGCD    | <u>GRFLRGYRQDAYDGKDYIALNEDLRSWTAADMAAQITTKRK</u> | <u>W</u> | <u>Q</u> | <u>E</u> | <u>A</u> | <u>A</u> | HAEQLRAYLEGTCVEWLRRYLENGKETL 179 |
| HLA-B15 | AGSHTLQRMYGCD    | <u>GRFLRGYRQDAYDGKDYIALNEDLRSWTAADMAAQITTKRK</u> | <u>W</u> | <u>Q</u> | <u>E</u> | <u>A</u> | <u>A</u> | HAEQLRAYLEGTCVEWLRRYLENGKETL 179 |

The HLA-A02 sequence is chosen as reference. Position 59 (Y), 94 (Y), 99 (Y), 142 (T), 147 (W), 155 (Q) and 159 (Y) are marked as boxes to present no polymorphic binding site in the MHC protein. All Binding residues are labeled red and underlined.
